# Supplementary material for: Circular CPM promotes chemoresistance of gastric cancer via activating PRKAA2‐mediated autophagy
Source: PubMed Central journal article supplement (PMC8787023; doi:10.1002/ctm2.708), 2022-01-24

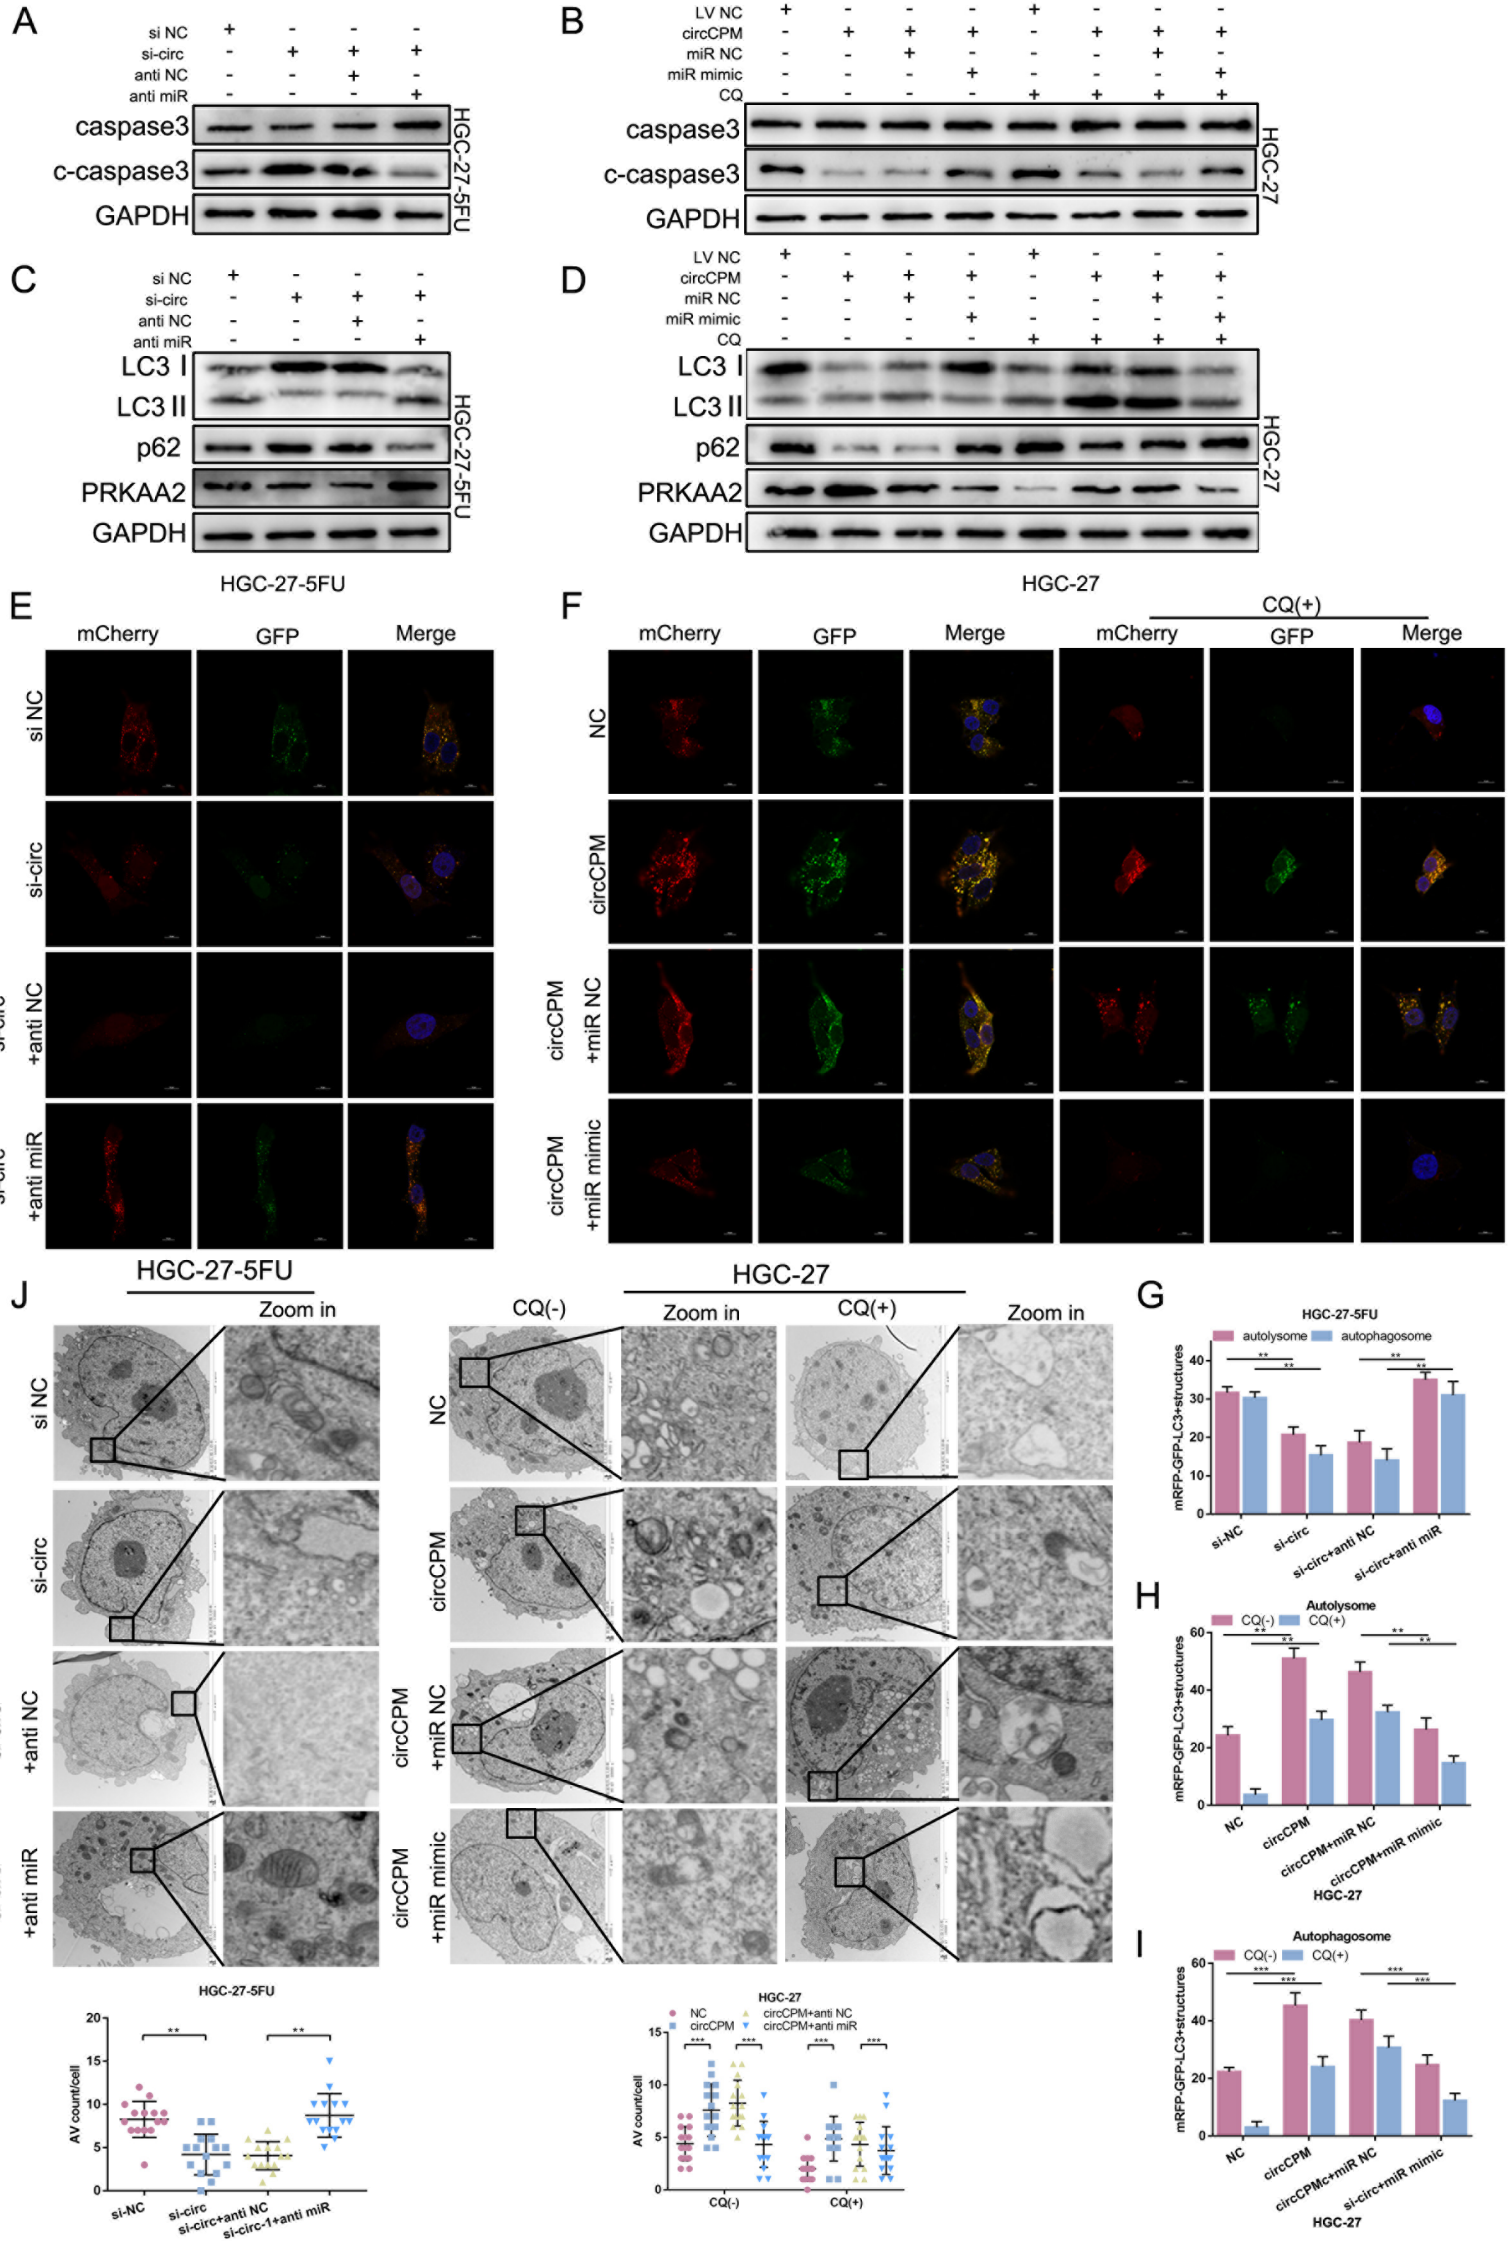

Supplement: CTM2-12-e708-s006.pdf [file CTM2-12-e708-s006.pdf]
